# Supplementary material for: Synthesis of Mn2O3/poly(styrene-co-butyl methacrylate) resin composites and their oil-absorbing properties
Source: Royal Society of Chemistry journal article supplement (doi:10.1039/c5ra21132h), 2015-01-01
Supplement: c5ra21132h1.pdf [file c5ra21132h1.pdf]

## **Synthesis of Mn<sub>2</sub>O<sub>3</sub>/poly(styrene-co-butyl methacrylate) resin composites and their oil-absorbing properties**

Tao Zhang <sup>a,b</sup>, Qian Zhang <sup>c</sup>, Xinpei Wang <sup>c</sup>, Qiurong Li <sup>c\*</sup>, Jian Rong <sup>b</sup>, Fengxian  
Qiu <sup>b\*</sup>

<sup>a</sup> Institute of Green Chemistry and Chemical Technology, Jiangsu University,  
Zhenjiang 212013, Jiangsu Province, China.

<sup>b</sup> School of Chemistry and Chemical Engineering, Jiangsu University, Zhenjiang  
212013, Jiangsu Province, China.

<sup>c</sup> Key Laboratory of Applied Chemistry, College of Environmental and Chemical  
Engineering, Yanshan University, Qinhuangdao 066004, Hebei Province, China.

---

\*Corresponding authors:

Tel./fax: +86 511 88791800.

E-mail: liqurong63@aliyun.com (Q. Li),

fxqiu@126.com (F. Qiu)

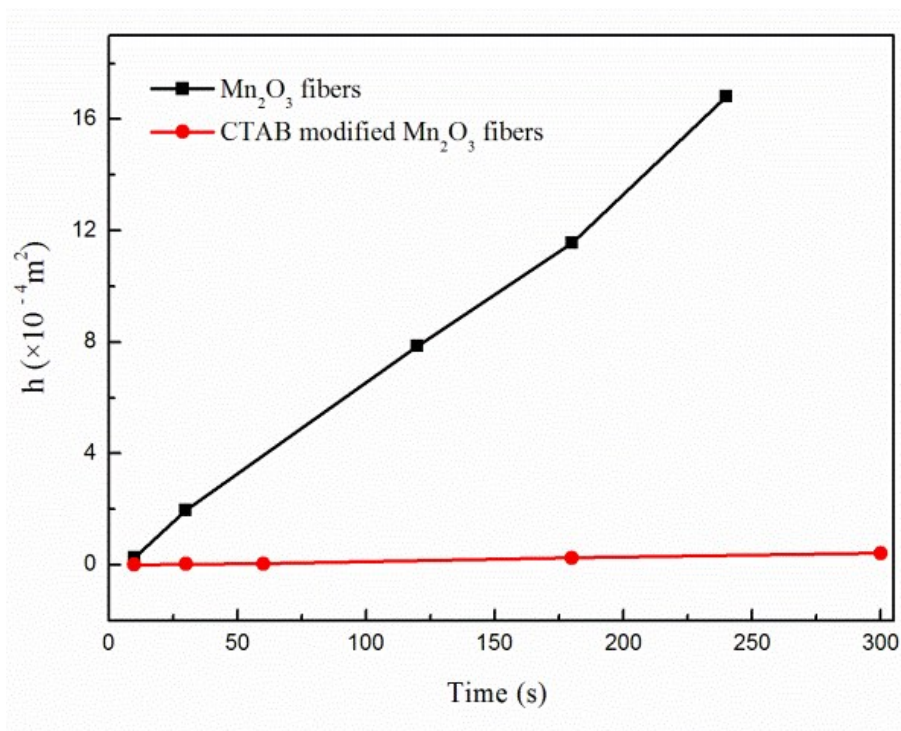

Fig. S1. Penetrating profiles of deionized water through the tubes packed with  $\text{Mn}_2\text{O}_3$  fibers and CTAB modified  $\text{Mn}_2\text{O}_3$  fibers (penetration height  $h^2$  verses time  $t$ ).

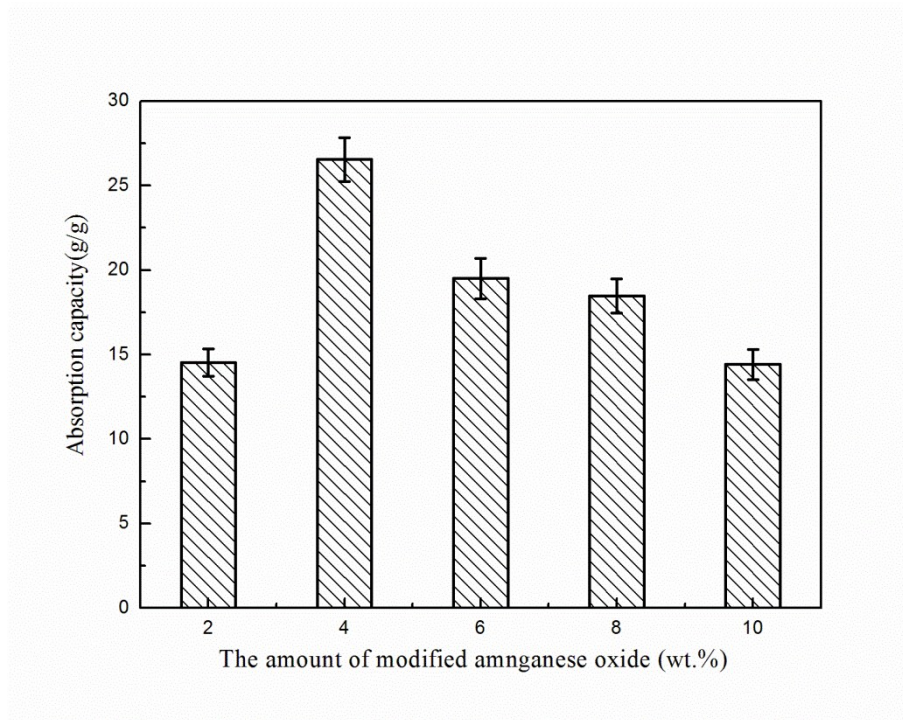

Fig.S2. Oil absorption properties of resin composites affected by the  $Mn_2O_3$  loading.

The optimal amount of  $Mn_2O_3$  fibers was 4%, at which higher oil absorption properties could be reached.

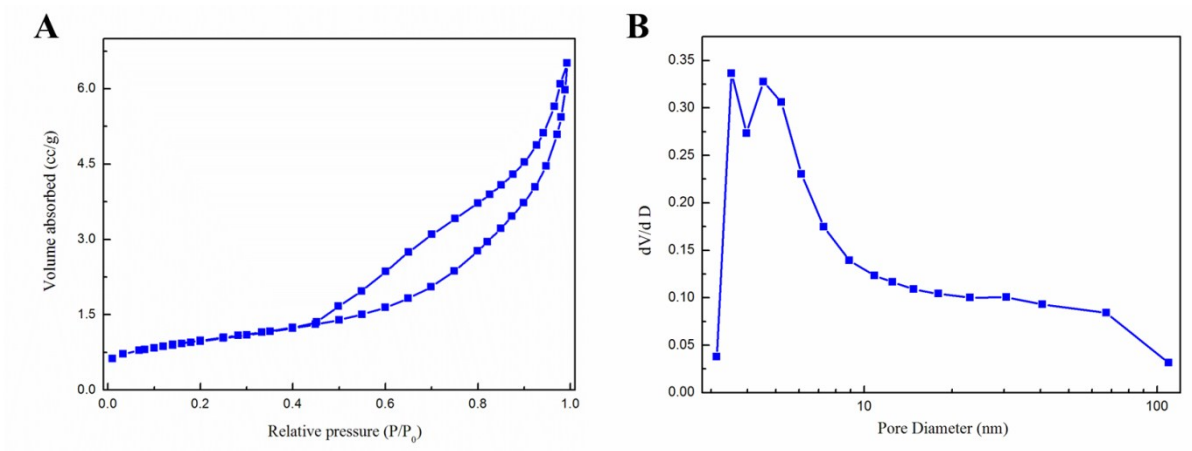

Fig. S3. N<sub>2</sub> adsorption–desorption isotherms and BJH pore size distributions of Mn<sub>2</sub>O<sub>3</sub> fibers.

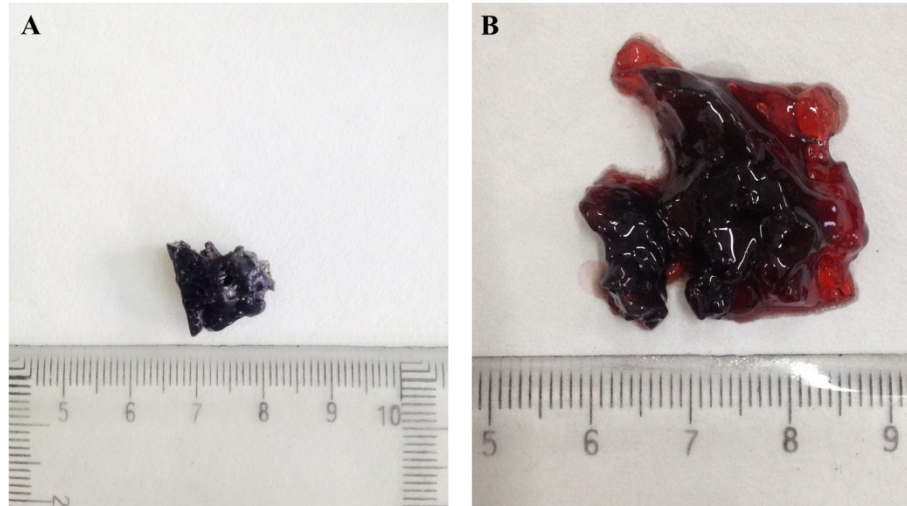

Fig.S4. Optical images of the oil absorption of resin composites (swelling properties).

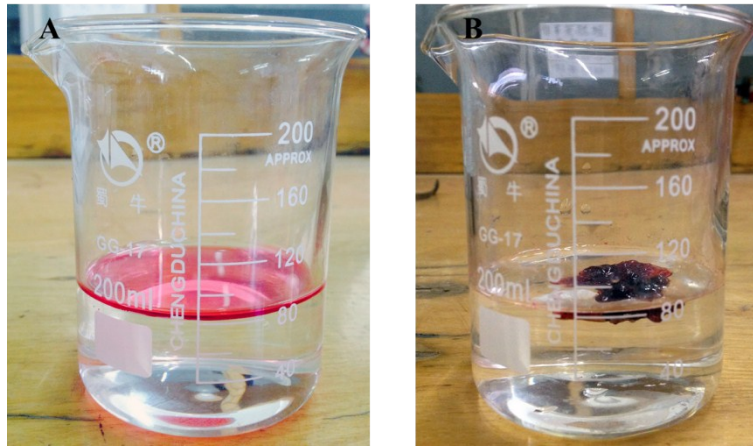

Fig. S5. Optical images of the toluene removal from the surface of water by a piece of resin composites (The toluene was dyed with Sudan II for observation).
